# Supplementary material for: Low power, non-coherent sensitized photon up-conversion: modelling and perspectives
Source: Royal Society of Chemistry journal article supplement (doi:10.1039/c2cp23900k), 2012-01-01
Supplement: c2cp23900k.pdf [file c2cp23900k.pdf]

## Low Power, Non Coherent Sensitized Photon Up-conversion: Modelling and Perspectives. (Electronic Supplementary Informations)

Angelo Monguzzi, Riccardo Tubino, Sajjad Hoseinkaini, Marcello Campione and Francesco Meinardi.

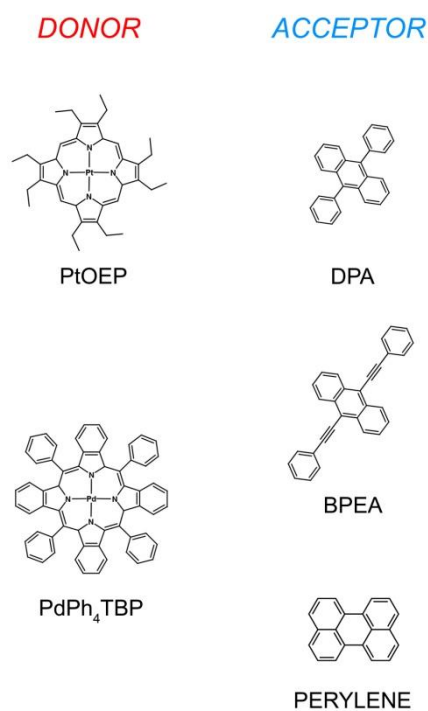

**Fig. ESI1** – Molecular structures of donors (*Pt(II) octaethylporphyrin*, PtOEP - *Pd(II) meso-tetraphenyltetrabenzoporphyrin*, PdPh<sub>4</sub>TBP) and acceptors (*9,10 diphenylanthracene*, DPA - *perylene*, PERYL - *9,10-bis(phenylethynyl) anthracene*, BPEA) exploited in experiments presented in Fig. 2, 3, 6, 7 and 8.

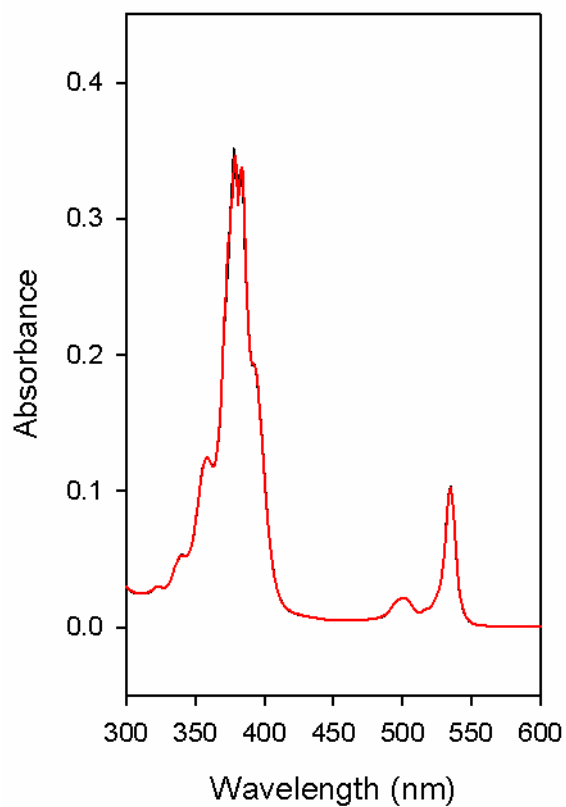

**Fig.ESI2** - Uv-VIS absorption spectra of a DPA( $10^{-3}$  M) and PtOEP ( $10^{-4}$  M) solution in de-oxygenated THF, freshly prepared (black line) and after high intensity pulsed 532 nm excitation (15 Hz,  $200 \text{ mW cm}^{-2}$  per pulse, red line). No difference in the absorption spectra is detected, demonstrating the photostability of selected dyes.
